# Supplementary material for: Safety and clinical outcomes of a first-in-human trial of point-of-care manufactured trispecific CAR T cells targeting CD19, CD20, and CD22
Source: Research Square preprint supplement (doi:10.21203/rs.3.rs-8605291/v1), 2026-02-09
Supplement: Supplementary file 1 [file a2215cc352f4556f9c467cd9.docx]

**Supplementary Figure 1. Trial schema.**

**
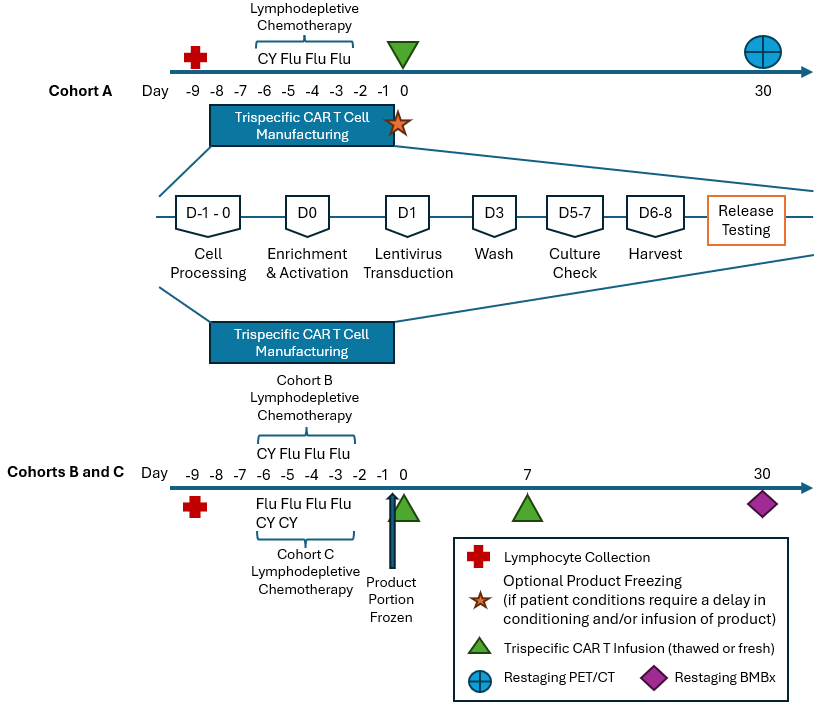
**

**Supplementary Figure 1 Legend:**

Trial schema. Treatment days shown are based on 8-day manufacturing schedule. CAR T infusion date was designated Day 0. Depending on the availability of the manufactured product, days between completion of chemotherapy and the infusion were adjusted.

**Supplementary Table 1. CD19, CD20, and CD22 expression Pre- and Post- CD19/20/22 CAR T in Relapse Samples**

| **Patient - Cohort - Dose Level** | **Diagnosis** | **Prior to CAR T** | | | | **Post-CAR T (at relapse)** | | |
| --- | --- | --- | --- | --- | --- | --- | --- | --- |
| CD19 | CD20 | CD22 | CD19 | | CD20 | CD22 |
| 001 - Cohort A - Dose Level 1 | B-PLL | + | +moderate | + | - | | - | Not Available |
| 002 -  Cohort A - Dose Level 1 | DLBCL | + | +dim to moderate | Not Available | + | | +dim | Not Available |
| 004 - Cohort A - Dose Level 2 | CLL | + | +dim | - | + | | +dim to moderate | - |
| 005 - Cohort A - Dose Level 2 | CLL | + | - | - | + | | - | - |
| 006 - Cohort A - Dose Level 2 | CLL | + | +dim | - | +dim | | +markedly dim | - |
| 001 - Cohort B - Dose Level 1 | Ph+ B-ALL | + | - | - | + | | - | + |
| 004 - Cohort B - Dose Level 1 | KMT2A B-ALL | - | - | +dim / partial | + | | - | + |
| 006 - Cohort B - Dose Level 2 | Richter's | + | +dim | - | + | | - | + |
| 007- Cohort B - Dose Level 2 | MCL | + | +moderate | + | + | | - | - |
| 012 - Cohort B - Dose Level 3 | Richter's | + | + | +moderate | Not Available | | Not Available | Not Available |
| 013 - Cohort B - Dose Level 3 | Ph+ B-ALL | + | + | - | + | | + | - |

**Supplementary Figure 2.** **Statistical Analysis (Area Under the Curve) Trispecific CAR T Cell Persistence by PCR Data**

**A**  **B**


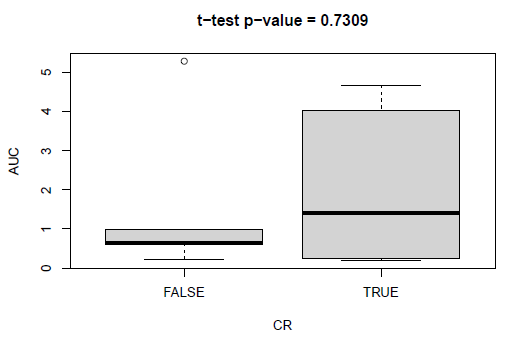

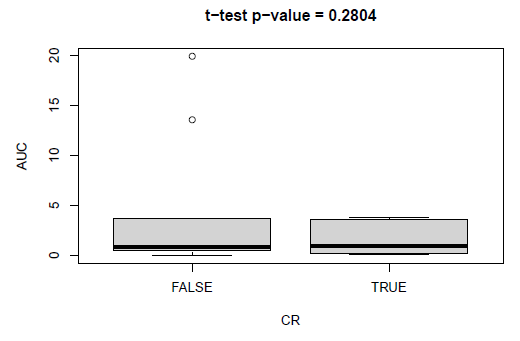


**C**


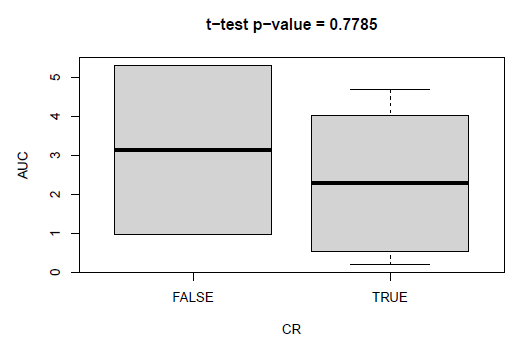


**Supplementary Figure 2 Legend:**

Area under the curve (AUC) of the log normalized trispecific CAR T Cell persistence (by PCR) data between day 0 and day 90 compared between complete responders (CR) and non-complete responders by two-sample t-test. Panel **(A)** shows data up to 90 days post-infusion and Panel **(B)** shows up to 30 days post-infusion for all patients. Panel **(C)** shows data up to 90 days post-infusion for lymphoma patients.

**Supplementary Figure 3.** **Immunophenotypic and functional characteristics of CD4+ T cells in NTTs in CR and PD cohorts.**


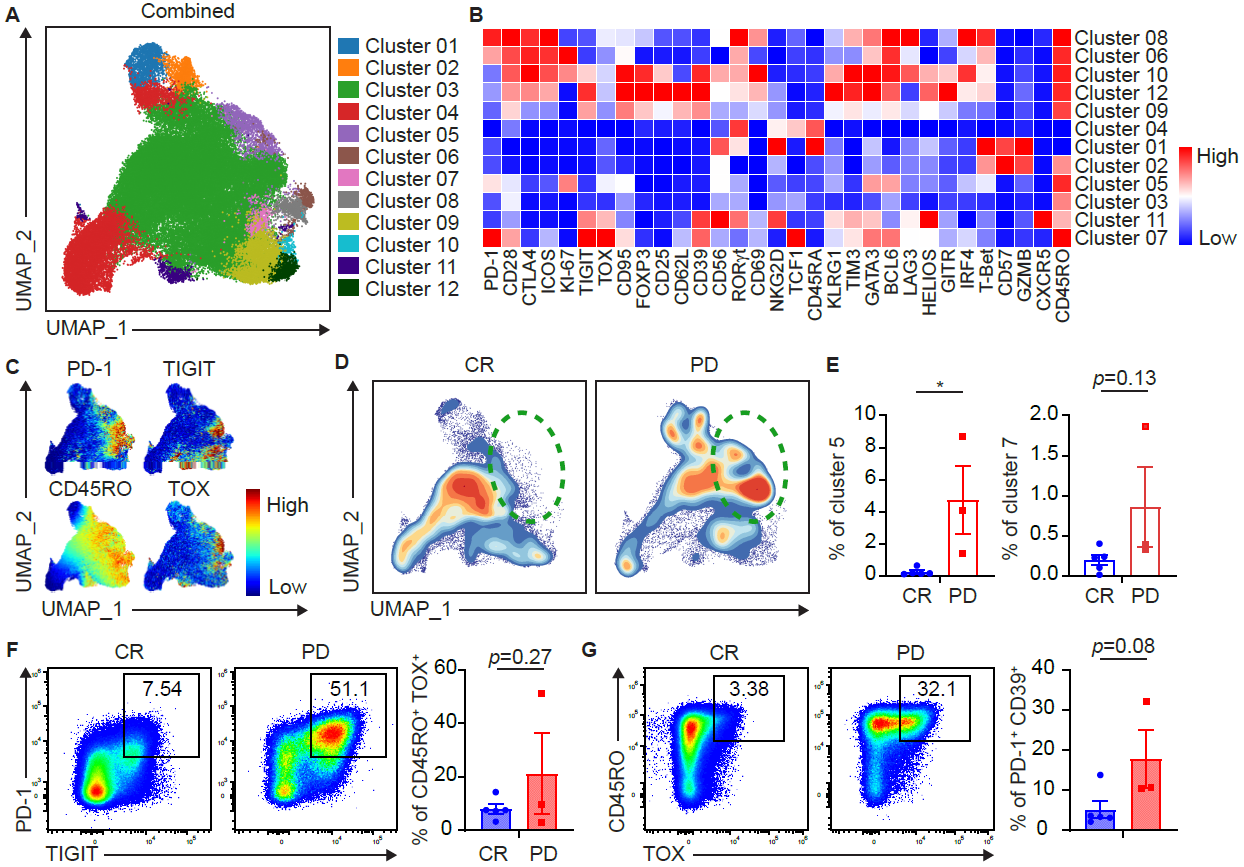


**Supplementary Figure 3 Legend:**

Samples from patient NTTs used to manufacture trispecific CAR T infusion product were analyzed via spectral flow cytometry. **(A)** UMAP dot plot of CAR**+** CD4**+** T cells from the total cohort (n=8). **(B)** Clustered heatmap showing key marker expressions on differentially abundant CAR**+** CD4**+** clusters. Color scale was determined by median normalization of each individual marker with blue representing low expression, white representing median expression and red representing high expression. **(C)** Expression plots of phenotypical markers present on CAR**+** CD4**+** T cells. **(D)** Contour UMAP plots of CAR**+** CD4**+** T cells in CR vs. PD cohorts. **(E)** Box plots showing clusters percentages of CAR**+** CD4**+** Cells in CR vs. PD cohorts. Left: Cluster 5. Right: Cluster 7. For **(F)** and **(G)**, 2D flow plot analysis was performed on spectral flow cytometry data from all patient NTT samples. **(F)** Representative 2D flow cytometry plots showing individual patient PD-1 and TIGIT expression on NTTs and corresponding box plot quantification in CR vs. PD cohorts. **(G)** Representative 2D flow cytometry plots showing individual patient CD45RO and TOX expression on NTTs and corresponding box plot quantification in CR vs. PD cohorts. Box plots in **(E), (F),** and **(G)** show quartiles with bands at the median; whiskers indicate 1.5 interquartile range; all observations overlaid as dots. p values are from two sample t test. p < 0.05 = *. p < 0.01 = **.

**Supplementary Figure 4. Immunophenotypic and functional characteristics CD4+ CAR+ T cell in Trispecific CAR T Infusion product.**

**
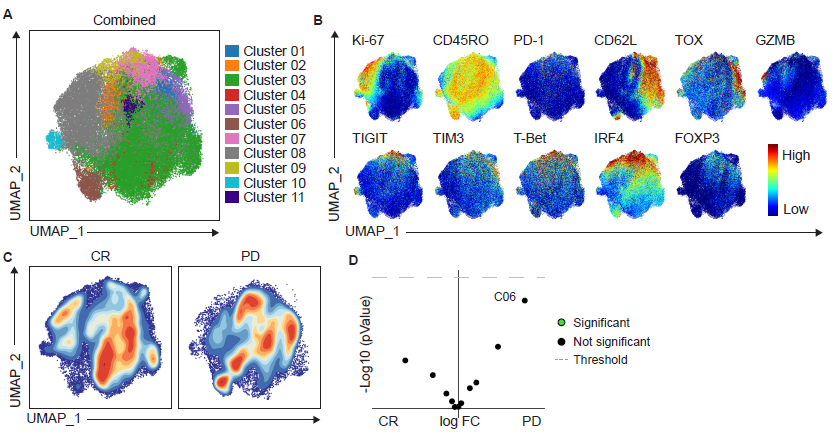
**

**Supplementary Figure 4 Legend:**

Patient’s trispecific CAR T infusion products were analyzed by spectral flow cytometry. **(A)** UMAP dot plot of CAR**+** CD4**+** T cells from the total cohort (n=8). **(B)** Expression plots of phenotypical and functional markers present on CAR**+** CD4**+** T cells. **(C)** Contour UMAP plots of CAR**+** CD4**+** T cells in CR vs. PD cohorts. **(D)** Volcano plot plots of all clusters differentially expressed in CR vs. PD cohorts. P value ≤  0.05 was considered significant.

**Supplementary Figure 5. Immunophenotypic and functional characteristics CD8+ CAR+ T cells in post-CAR T infusion PBMCs at Day 7.**

**
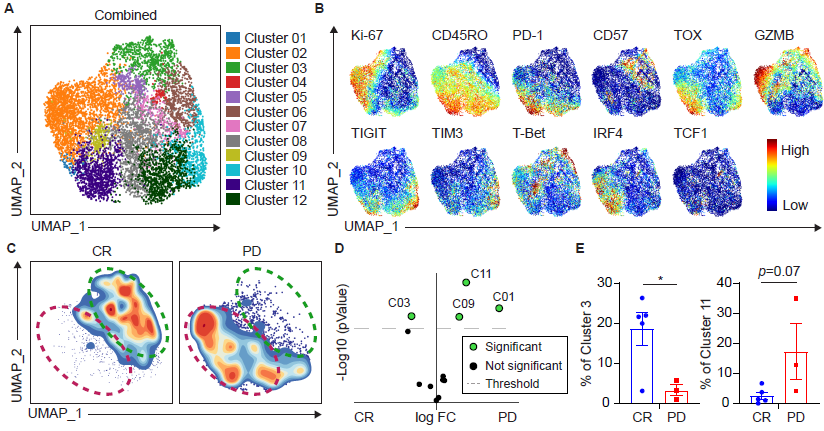
**

**Supplementary Figure 5 Legend:** PBMCs from the Day 7 post-CAR T timepoint were analyzed via spectral flow cytometry. **(A)** UMAP dot plot of CAR**+** CD8**+** T cells from the total cohort (n=8). **(B)** Expression plots of phenotypical and functional markers present on CAR**+** CD8**+** T cells. **(C)** Contour UMAP plots of CAR**+** CD8**+** T cells in CR vs. PD cohorts. **(D)** Volcano plot plots of all clusters differentially expressed in CR vs. PD cohorts. P value ≤  0.05 was considered significant. **(E)** Box plots showing clusters percentages of CAR**+** CD8**+** Cells in CR vs. PD cohorts. Left: Cluster 3. Right: Cluster 11. Box plots show quartiles with bands at the median; whiskers indicate 1.5 interquartile range; all observations overlaid as dots. p values are from two sample t test. p < 0.05 = *.

**Supplementary Figure 6. Immunophenotypic and functional characteristics of CD4+ CAR+ T cell in post-CAR T PBMCs at Day 7.**

**
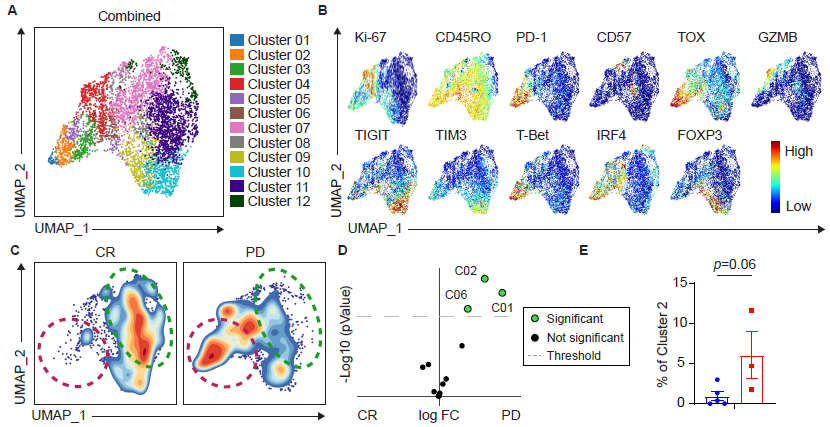
**

**Supplementary Figure 6 Legend:**

PBMCs from the Day 7 post-CAR T timepoint were analyzed via spectral flow cytometry. **(A)** UMAP dot plot of CAR**+** CD4**+** T cells from the total cohort (n=8). **(B)** Expression plots of phenotypical and functional markers present on CAR**+** CD8**+** T cells. **(C)** Contour UMAP plots of CAR**+** CD4**+** T cells in CR vs. PD cohorts. **(D)** Volcano plot plots of all clusters differentially expressed in CR vs. PD cohorts. P value ≤  0.05 was considered significant. **(E)** Box plots showing cluster percentages of CAR**+** CD4**+** Cells in CR vs. PD cohorts for cluster 2. Box plot shows quartiles with bands at the median; whiskers indicate 1.5 interquartile range; all observations overlaid as dots. p values are from two sample t test.

**Supplementary Figure 7: Immunophenotypic and functional characteristics CD8+ CAR+ T cells in Post-CAR T PBMCs at Day 14.**

**
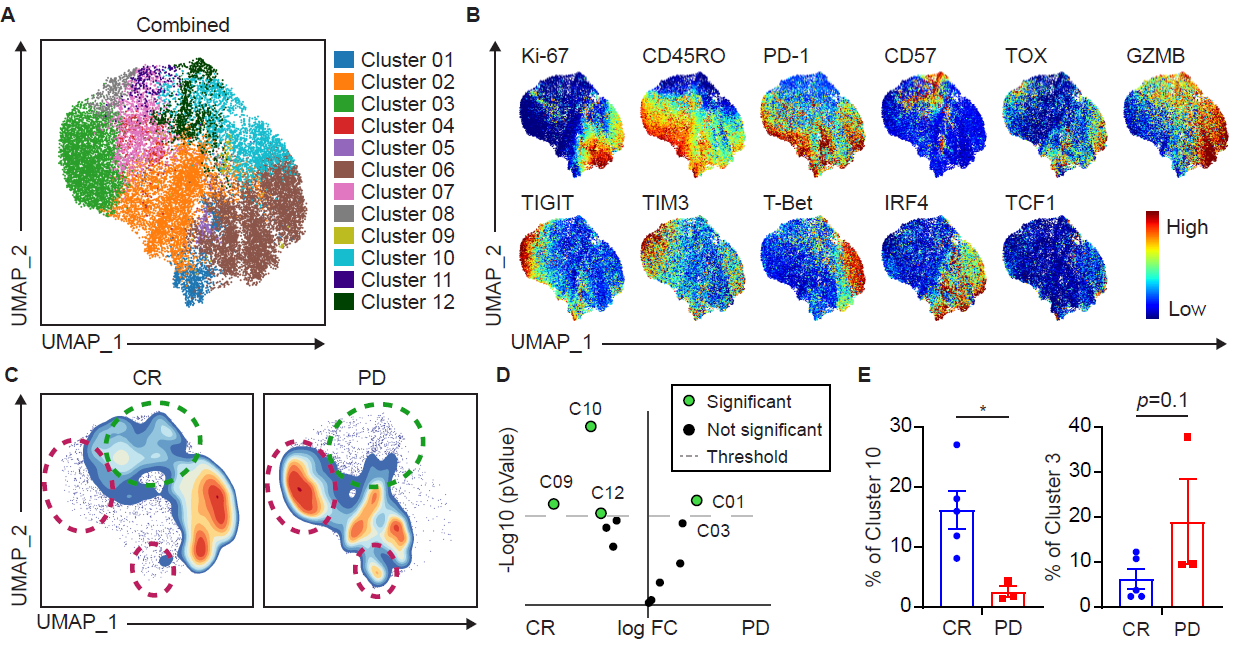
**

**Supplementary Figure 7 Legend:** PBMCs from the Day 14 post-CAR T timepoint were analyzed via spectral flow cytometry. **(A)** UMAP dot plot of CAR**+** CD8**+** T cells from the total cohort (n=8). **(B)** Expression plots of phenotypical and functional markers present on CAR**+** CD8**+** T cells. **(C)** Contour UMAP plots of CAR**+** CD8**+** T cells in CR vs. PD cohorts. **(D)** Volcano plot plots of all clusters differentially expressed in CR vs. PD cohorts. P value ≤  0.05 was considered significant. **(E)** Box plots showing clusters percentages of CAR**+** CD8**+** Cells in CR vs. PD cohorts. Left: Cluster 10. Right: Cluster 3. Box plots show quartiles with bands at the median; whiskers indicate 1.5 interquartile range; all observations overlaid as dots. p values are from two sample t test. p < 0.05 = *.

**Supplementary Figure 8. Immunophenotypic and functional characteristics of CD4+ CAR+ T cell clusters in post-CAR T PBMCs at Day 14.**

**
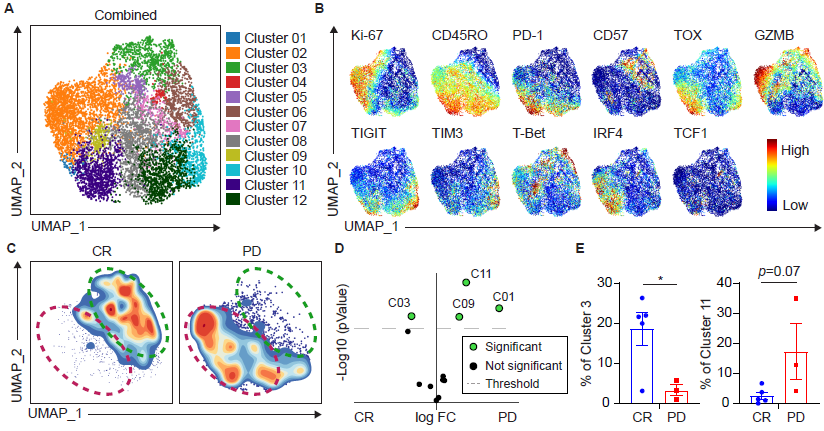
**

**Supplementary Figure 8 Legend:**

PBMCs from the Day 14 post-CAR T timepoint were analyzed via spectral flow cytometry. **(A)** UMAP dot plot of CAR**+** CD14**+** T cells from the total cohort (n=8). **(B)** Expression plots of phenotypical and functional markers present on CAR**+** CD14**+** T cells. **(C)** Contour UMAP plots of CAR**+** CD14**+** T cells in CR vs. PD cohorts. **(D)** Volcano plot plots of all clusters differentially expressed in CR vs. PD cohorts. P value ≤  0.05 was considered significant. **(E)** Box plots showing clusters percentages of CAR**+** CD14**+** Cells in CR vs. PD cohorts. Left: Cluster 3. Right: Cluster 11. Box plots show quartiles with bands at the median; whiskers indicate 1.5 interquartile range; all observations overlaid as dots. p values are from two sample t test. p < 0.05 = *.

**Supplementary Table 2.** **40 color spectral flow cytometry CAR T cell immunophenotyping panel.**


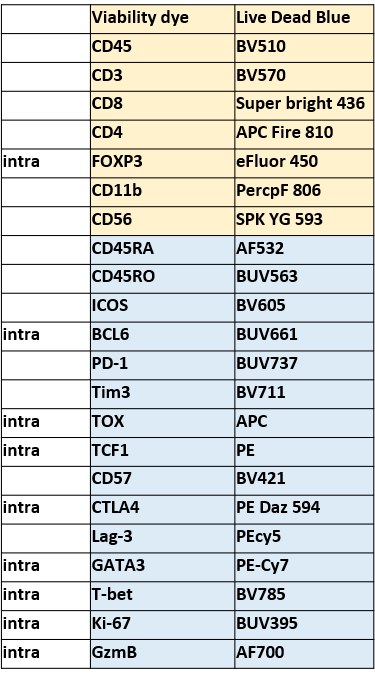

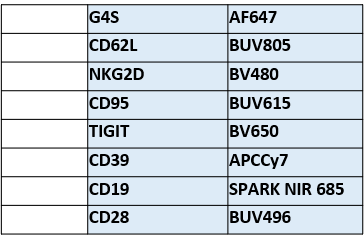


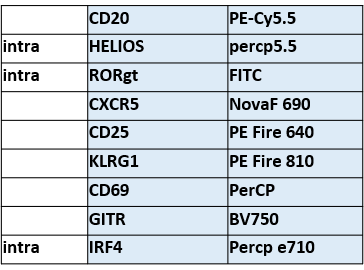


**Supplementary Figure 9. Trispecific CAR+ T cell Gating Strategy for spectral flow cytometry.**


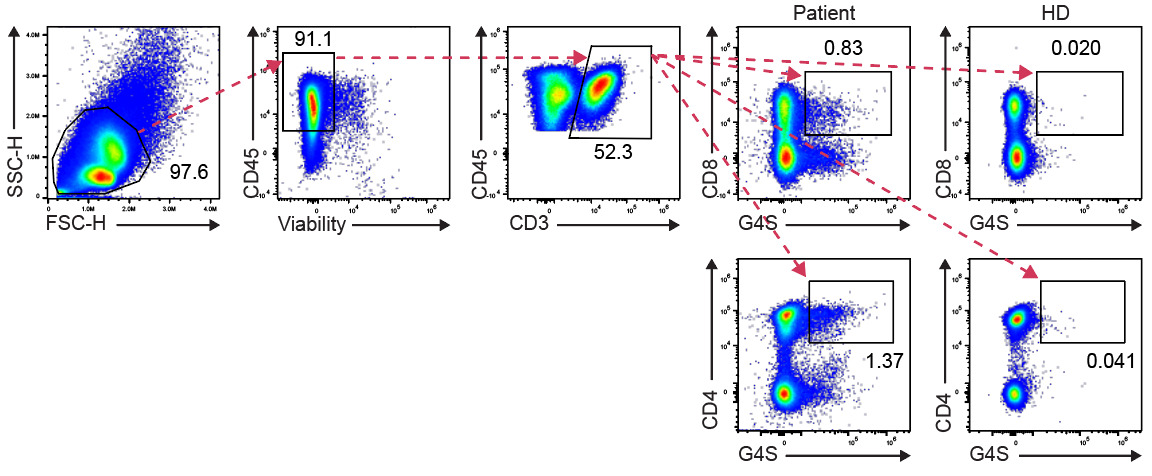


**Supplementary Figure 9 Legend:**

NTTs, trispecific CAR T infusion product, and PBMCs at post-CAR T timepoints were analyzed via spectral flow cytometry.G4S Linker antibody was used to identify CAR+ cells. Representative 2D flow cytometry plot showing gating strategy for CAR**+** CD8**+** and CAR**+** CD4**+** CAR T cells is shown here. Healthy donor (HD) samples were utilized as negative controls. Percentages of CAR**+** CD8**+** T cells, CAR**+** CD4**+** T cells in a representative patient and healthy donor control are shown.
